# Supplementary material
Source: publisher figshare collection journal article supplement (https://acs.figshare.com/ndownloader/files/22810715)
Supplement: Supplementary file 1 [file 22810715]

# Supporting Information

## Layer-by-Layer Decorated Nanoscale ZIF-8 with High Curcumin Loading Effectively Inactivate Gram-Negative and Gram-Positive Bacteria

*Shihao Duan,<sup>1, 2</sup> Xia Zhao,<sup>2</sup> Zhaohui Su,<sup>2</sup> Cheng Wang<sup>1</sup> and Yuan Lin<sup>\*2</sup>*

<sup>1</sup> Tianjin Key Laboratory of Advanced Functional Porous Materials and Center for Electron Microscopy, Institute for New Energy Materials and Low-Carbon Technologies, School of Materials Science and Engineering, Tianjin University of Technology, Tianjin 300384, P.R. China.

<sup>2</sup> State Key Laboratory of Polymer Physics and Chemistry, Changchun Institute of Applied Chemistry, Chinese Academy of Sciences, Changchun 130022, P. R. China.

\*Correspondence should be addressed to Dr. Yuan Lin: 5625 Renmin Street, Changchun, Jilin, 130022, P.R. China.; Email: linyuan@ciac.ac.cn; Telephone: 86-0431-85262658; Fax: 86-0431-85262126.

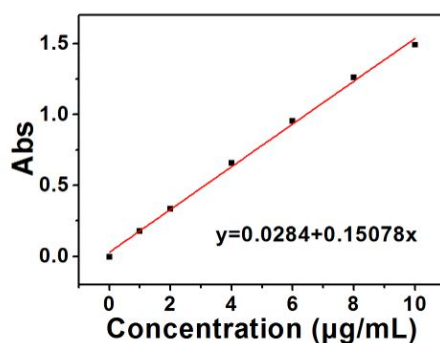

Figure S1. The linear relationship between the concentration of CCM and absorption intensity in ethanol.

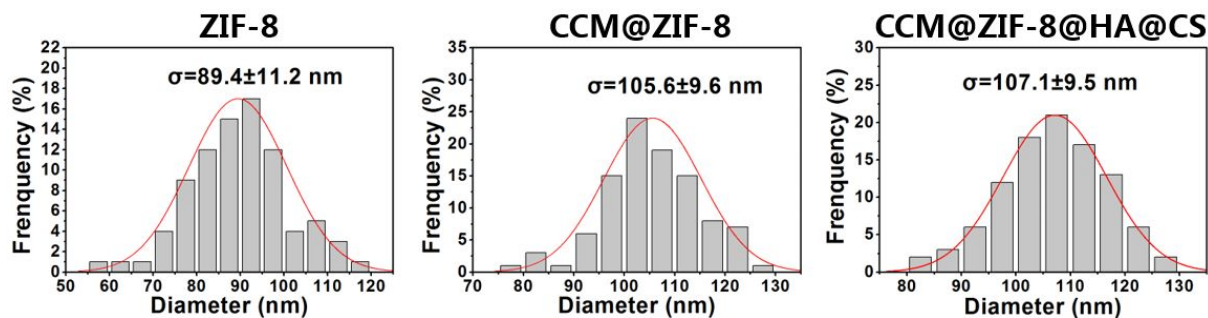

Figure S2. Size distribution histograms of TEM images of ZIF-8, CCM@ZIF-8 and CCM@ZIF-8@HA@CS.

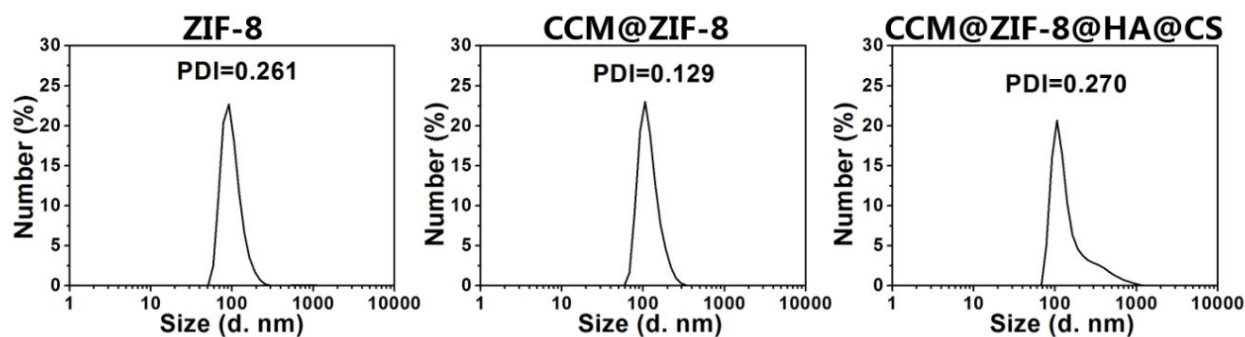

Figure S3. Hydrodynamic size distribution of the as-prepared ZIF-8, CCM@ZIF-8 and CCM@ZIF-8@HA@CS in water.

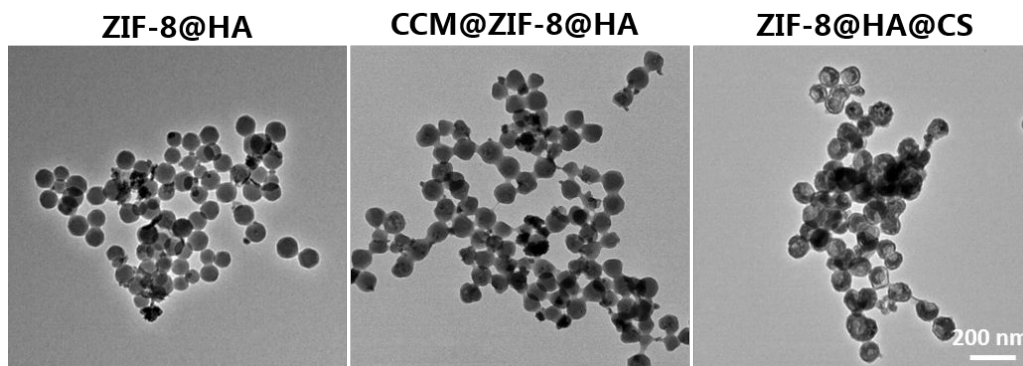

Figure S4. TEM images of ZIF-8@HA NPs, CCM@ZIF-8@HA NPs and ZIF-8@HA@CS NPs.

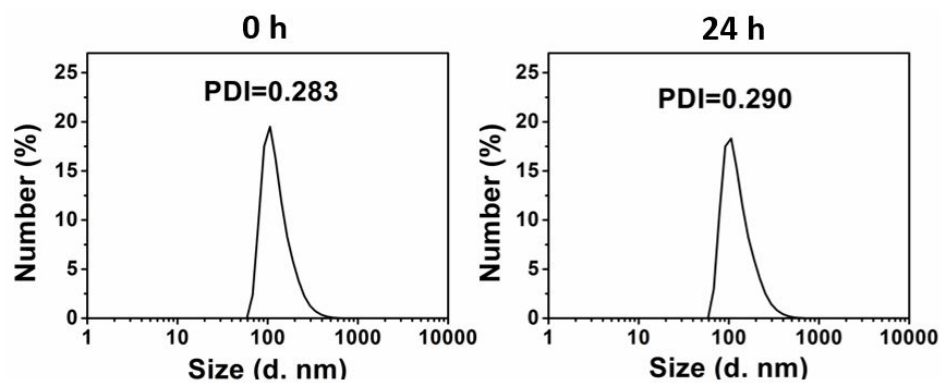

Figure S5. Hydrodynamic size distribution of the as-prepared CCM@ZIF-8@HA@CS stored in LB at different times.

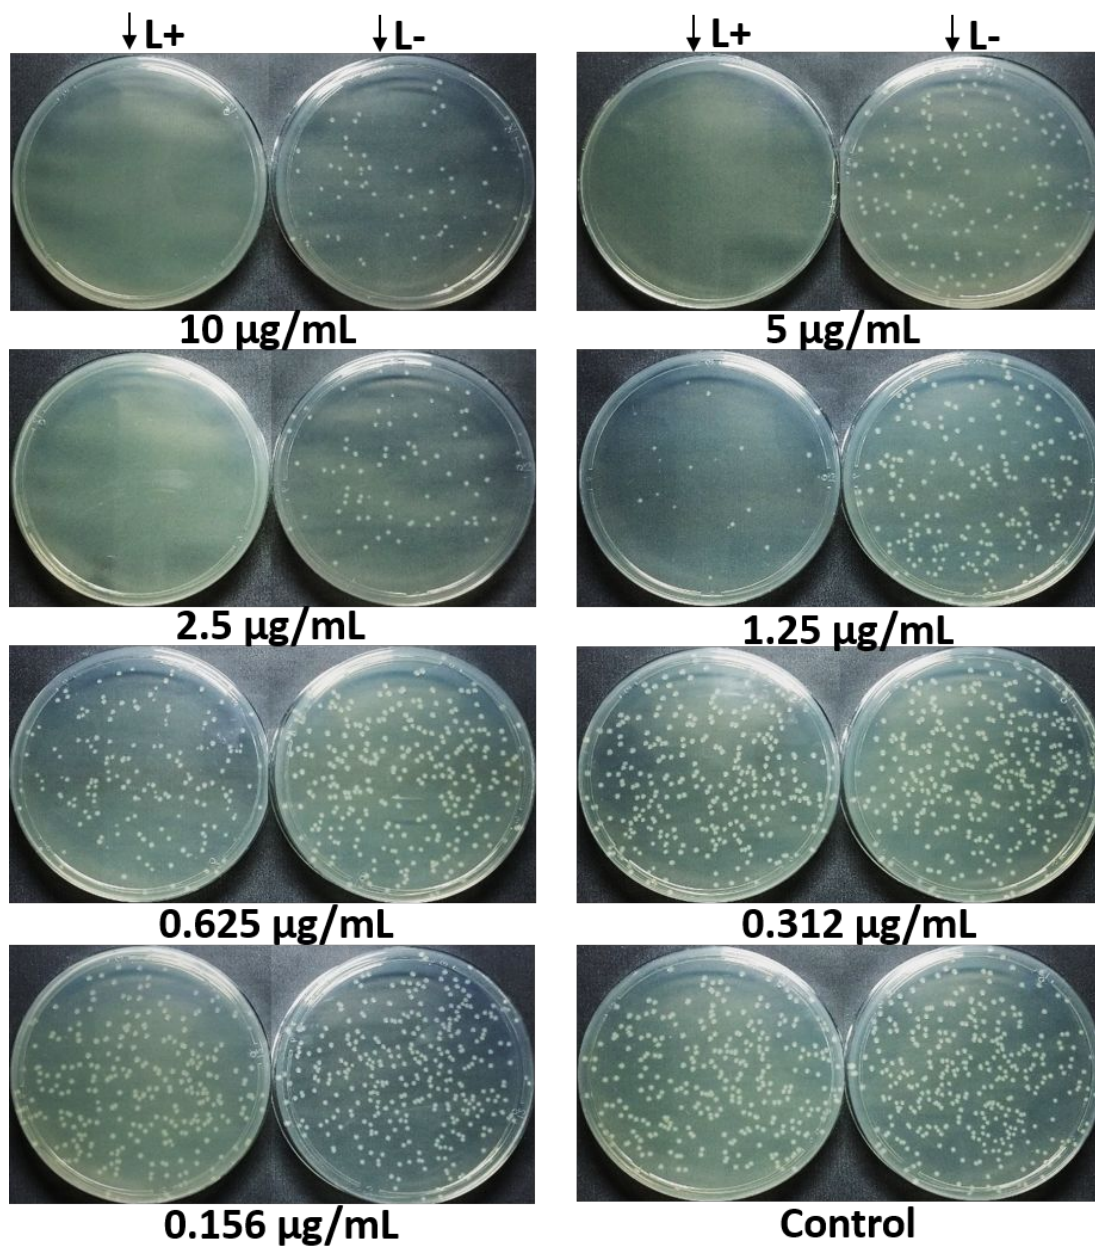

Figure S6. Toxicity of CCM@ZIF-8@HA@CS of different concentrations against *E. coli*. (L-) and (L+) indicate that the bacteria were tested in the dark or 10 min blue light irradiation.



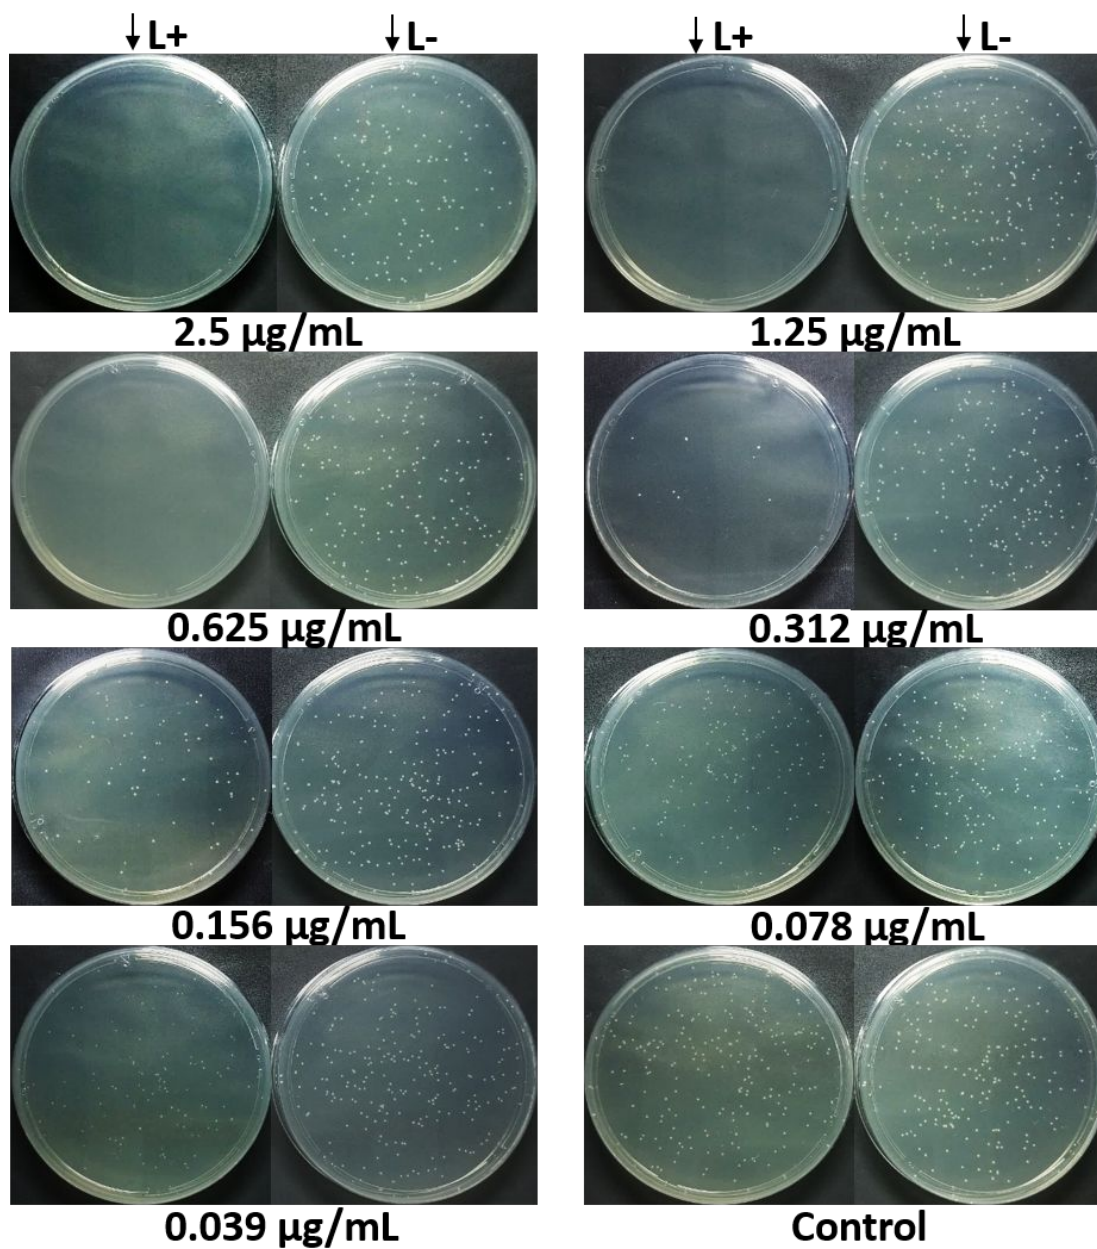

Figure S7. Toxicity of CCM@ZIF-8@HA@CS of different concentrations against *S. aureus*. (L-) and (L+) indicate that the bacteria were tested in the dark or 10 min blue light irradiation.

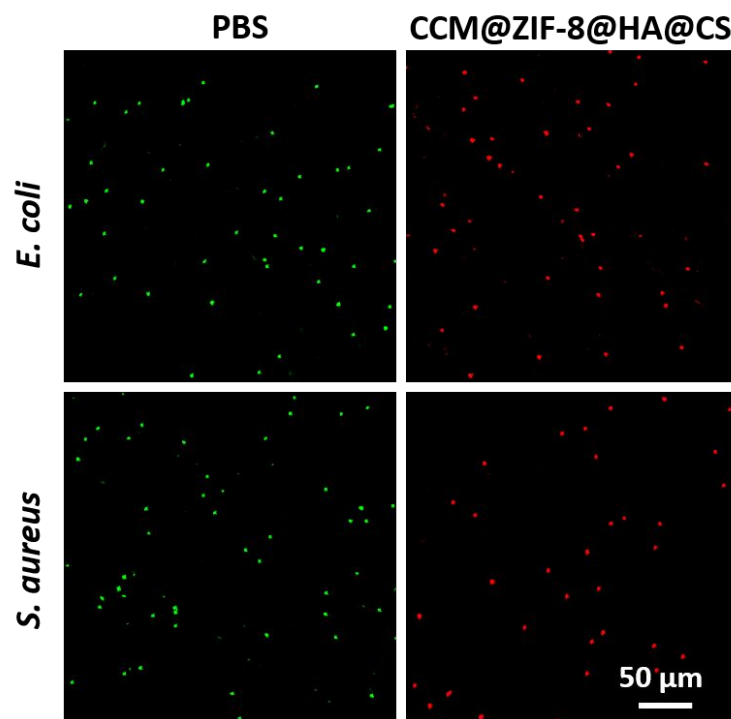

Figure S8. Confocal fluorescence images of SYTO 9- and PI-stained *E. coli* and *S. aureus* treated with PBS (control) or CCM@ZIF-8@HA@CS at MIC (2.5  $\mu\text{g/mL}$ , 0.625  $\mu\text{g/mL}$ ), respectively.

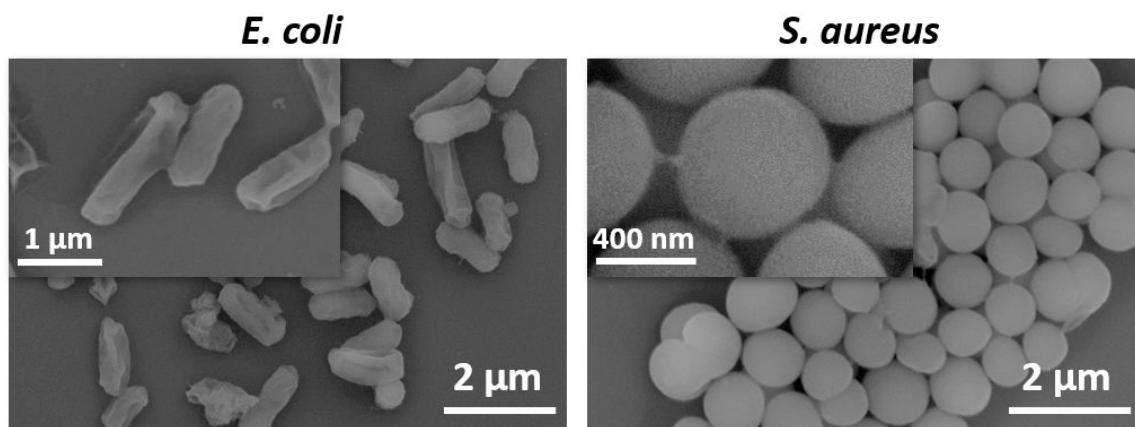

Figure S9. SEM images of *E. coli* and *S. aureus* treated with ciprofloxacin (0.1 mg/L). The insets are enlarged images of the bacteria.
